# Supplementary material
Source: publisher figshare collection journal article supplement (https://geolsoc.figshare.com/ndownloader/files/24108881)
Supplement: Supplementary file 1 [file 24108881]

## Sheet: Sheet1
Table S2: XRF whole rock Sr (ppm) analyses in boreholes 17, 18, 21, 22, 35, 39, 40 & 41																	Table S1: XRF whole analyses of Sr (ppm) of limestone beds
	Borehole 17				Borehole18				Borehole 21				Borehole 22				Borehole 35				Borehole 39				Borehole 40				Borehole 41
sample	Dist (m)	Sr ppm		sample	Dist (m)	Sr ppm		sample	Dist (m)	Sr ppm		sample	Dist (m)	Sr ppm		sample	Dist (m)	Sr ppm		sample	Dist (m)	Sr ppm		sample	Dist (m)	Sr ppm		sample	Dist (m)	Sr ppm
26 MSL	32.52	1090		2 MSL	27.14	870		12 Rob	10.97	716		3 MSL sacc	29.6	266		13 MSL	11	438		25 Smiddy dark	24.5	2701		27 Smiddy dark	30.7	2193		25 Peg dark	26.98	2496
28 MSL	31.02	875		3 MSL sacc	25.04	1298		11 Rob sacc	8.98	702		2 MSL sacc	28.21	348		11 MSL sacc	7.8	440		20 Peg dark	19.08	2275		22 Peg dark	25.66	1801		24 Peg dark	26.37	2619
31 MSL	27.12	327		4 MSL sacc	22.04	264		9 Rob sacc	6.4	549		1 MSL sacc	26.62	286		6 MSL sacc	0.6	367		19 Peg sacc	17.57	786		21 Peg	24.46	741		23 Peg sacc	26.21	871
1 MSL sacc	24.32	374		6 MSL sacc	19.14	242		4 MSL sacc	3.66	1124		7 MSL sacc	6	470		5 MSL sacc	0.4	506		17 Peg	14.74	409		20 Peg Sacc	23.01	474		22 Peg sacc	24.8	578
2 MSL sacc	21.32	304		7 MSL sacc	18.94	382		2 MSL sacc	0.56	797		11 MSL sacc	0.6	558						8 U Rob dark	6.02	2022		19 Peg dark	22.78	2257		21 Peg sacc	24.4	382
3 MSL sacc	18.22	307		8 MSL sacc	15.94	341														7 U Rob dark	4.38	2632		18 Peg Sacc	20.57	581		20 Peg sacc	21.89	561
5 MSL sacc	15.22	291		9 MSL sacc	12.84	322														4 L Rob sacc	3.03	941		13 U Rob dark	11.08	2302		13 U Rob	13.91	1536
6 MSL sacc	11.92	293		10 MSL sacc	9.84	285														3 L Rob sacc	1.63	605		10 L Rob Sacc	8.84	800		12 U Rob dark	12.9	2545
39 MSL sacc	4.72	247																						3 MSL Sacc	1.68	729		11 U Rob dark	12.22	2780
40 MSL sacc	3.82	216																						2 MSL Sacc	0	728		9 L Rob sacc	11.85	1143
9 MSL sacc	3.62	242																										8 L Rob	10.52	1110
15 MSL sacc	2.22	400																										7 L Rob	9.73	937
17 MSL sacc	1.7	366																										5 L Rob sacc	9.53	1133
18 MSL sacc	0.2	219															Dist (m) - distance in mteres from Whin Sill contact
																	Sacc - saccharoidal marble
Dist (m) - distance from Whin Sill contact in metres
MSL - Melmerby Scar Lst; Rob - Robinson Lst; Peg - Pehorn Lst
sacc - saccharoidal
